# Supplementary material for: Do Human iPSC Derived Cardiomyocytes Cultured on PLA Scaffolds Induce Expression of CD28/CTLA 4 by T Lymphocytes?
Source: Preprints.org preprint supplement (doi:10.20944/preprints202112.0457.v1), 2021-12-28
Supplement: Supplementary file 1 [file supplementary]

**Table S1.** Profile of CD28 and CTLA-4 expression on T-lymphocytes

| **Group** | **CD4+/CD28+** | **CD4+/CD152+** | **CD8+/CD28+** | **CD8+/CD152+** |
| --- | --- | --- | --- | --- |
| CM | 58,72 ± 4,54 | 0,04 ± 0,03 | 17,21 ± 3,92 | 0,02 ± 0,02 |
| PLA scaffold | 61,35 ± 1,80 | 0,27 ± 0,23 | 17,87 ± 2,83 | 0,15 ± 0,09 |
| TEC | 59,87 ± 3,80 | 0,19 ± 0,13 | 16,64 ± 3,60 | 0,06 ± 0,05 |
| conA | 66,31 ± 1,56 | 1,23 ± 0,55 | 21,70 ± 5,33 | 0,10 ± 0,05 |
| neg control | 55,48 ± 8,85 | 0,06 ± 0,03 | 16,85 ± 5,04 | 0,03 ± 0,01 |

CM – culture of hiPSC-derived cardiomyocytes; PLA scaffold - microfiber scaffold without CM; TEC - hiPSC-derived cardiomyocytes on PLA scaffold; conA – cell stimulation with concanavalin A; k- – intact cells in culture medium.
